# Supplementary material
Source: publisher figshare collection journal article supplement (https://karger.figshare.com/articles/dataset/_/28796135)
Supplement: Supplementary file 1 [file 1]

**Supplementary Material 1**

Schematics of the efficientnetb3_unet model used in the segmentation training. The design include all the parameters of each layers, their direct and skip connections.
